# Supplementary material for: Determination of Optimal Harvest Time for Preventing Seed Browning Associated With Hot Pepper Seed Maturity During Cold Storage
Source: Preprints.org preprint supplement (doi:10.20944/preprints202010.0456.v1), 2020-10-22
Supplement: Supplementary file 3 [file supplementary]

## Sheet: pepper
Table S1. Primers usde in the study of gene expression analysis
Gene	Primer sequences(5'-3')
	Forward	Reverse
ACTIN	GGG ATG GGT CAA AAG GAT GC	GGT TCA AGG GTG CTT CAG TG
eIF4E	GCT TCG CAA CGT CTA CAC TT	AGC AGC GTA TAT AGC CAG CT
CAT	ATA CAG GCC AGA ATC CTC GG	CTC GTG TTC CTT GCA GCA TT
POD	GTG GAA GGA AAGCTG CCA AA	TCG TGA TGT TCG TGA AAG CA
LOX	ATT ACC AAG ACT CGG CCC AA	AGG GTA CTG GCC GAA ATT CA
PME1	GTG CTG CTG CTG CTG TTT TC	GTG TTC CAT GGA GCC CAT CC
cCEL3	TGG GAA GTG AGC TTG GCA AC	AAG ACA ATG GAG GCA GCA GC
PBG1	AAT TCC TCA ACG GCC AGC TG	ACT CTC TCA GGT GCC CGT AC
(1)LRR
(2)LEV_ZI
(3)SNF7
(4)DVF
(5)UHPC
(6)AP2
(7)HSF
(8)TRANSFER
(9)CV_OXI
(10)RIBOSOM
(11)TYROSINE
(12)WD40
(13)GIYCO
(14)AP2
(15)ARM
(16)CCT
(17)MIO
(18)TRX
(19)LRR
(20)GLYCO
(21)CYPX
(22)EXOSTO
(23)TRRKC
(24)lipase
(25)cyclin
(13)glyco-2
(20)glyco-2
<고온처리시 UP-REGULATED GENE PRIMER(100PM)>
2782)ACYL-transferase
17042)histone deacetylase
2955)oxoglutarate oxygenase
9838)phospholipase
11137)levcinezipper
3602)acetyltrans ferase
3465)heat shock transcription factor
4)osmo-2
14)trypto-2
549)v-box
3053)amino trans ferase
10569)SRG1
3383)BHLH DNA - binding
18370)allene oxide
6161)PAP
8988)amaylse
(5)carbo-2
15)NAM-2
1168)poly galacluronase-2
5542)sugar transporter
10646)oxophytodienoate reductase
3612)cyto chrome P450
18784)WRKY
9049)Hydrolases
tubulin
10)HSP-2
16)PHOS-2
5040)OSMOTIN
2079)tranmembrane
6012)tryptophan synthase
10671)serine car boxy peptidase
0786)acylhydrolase
6011)tryptophan synthase
14992)acid phosphatase
12)amino-2
17)SRG-2
7741)carbonic anhydrase
9266)NAM1
11123)lactoylglutathionelyase
3109)HAD
16261)glycosyl transferase
17600)RCC1
tubulin
13)SUGAR-2
19)serine-2
pepper gene cloning 용 unknow gene 100pmol
1)NAC-NHE
PEPPER4-inter
3)WRKY-NOT
2)cinnamic-NHE
5)PAL-NHE
4)LOX-NHE
5)ca ERF4-bam
1)ca ERF-bam
5)ca ERF4_XHO
1)ca ERF-bam
4)ca ERF3-BAM
4)ca ERF3-XHO
6)MKK-NHE
6)MKK-NOT
3)ca ERF2-BAM
3)ca ERF2-XHO
2)ca ERF1-BAM
2)ca ERF1-XHO
1)ca ERF-XHO
T7 promoter
<고추저온시 up-regulate gene primer(100pm)>
28)WRKY-3 ®
4)OSMO-3
25)HAD-2
28)WRKY-2
29)trypto-2
30)glyco-2
20)lacto-2 (F)
15)NAM-3 (F)
29)trypto-3
(25)HAD-3
19)serine-3
17)SRG-3
16)phos-3
13)sugar-3
10)HSP-3
5)carbo-3
14)trypto-3
35)RCC-2
37)amayl-2
35)RCC-3
7)ca-JAZ1
OPR-
JMT
capsicum annuum (_INC) 1/8.14 down-regulated gene primer sets(100pmol)
1)SCADH
2)sec-PRX
3)VSP
4)CYTP 450
5)permeases
6)annexin
7)chloro
8)znADH
9)trans_IPPS
10)keratin
11)st phosphatase
12)SGNH_lipase
13)TIF
14)WRKY_binding
1)scADH_2
2)sec_prx_2
3)VSP_2
6)annexin_2
7)chloro_2
8)znADH_2
13)TIF_2
14)WRKY_binding_2
capsicum annuum HOUSEKEEPING GENE primer sets (100pmol) 11/23.13
ca_LF 5A2
ca_ubqE2
ca_ubq8
capsicum annuum (_INC) 1/8.14 DOWN-regulated genes primer sets (100pmol)
2)sec_prx_3
3)VSP_3
7)chloro_3
8)ZnADH_3
